# Supplementary material for: Alterations in Brain Structures Related to Taste Reward Circuitry in Ill and Recovered Anorexia Nervosa and in Bulimia Nervosa
Source: Atypon-hosted journal article supplement (doi:10.1176/appi.ajp.2013.12101294), 2013-05-17
Supplement: 1152_ds002.pdf [file 1152_ds002.pdf]

## Correction

In the May 17, 2013, advance online publication of “Alterations in Brain Structures Related to Taste Reward Circuitry in Ill and Recovered Anorexia Nervosa and in Bulimia Nervosa,” by Guido K. Frank, M.D., et al., the abstract incorrectly indicated that the study used functional magnetic resonance imaging; in fact the study used structural imaging. This correction was made for the article’s online reposting on June 26, 2013, as well as for the article’s print appearance in the October 2013 issue and for its online posting as part of that issue.
